# Supplementary material for: Concentration levels and risk assessment of organochlorine and organophosphate pesticide residue in selected cereals and legumes sold in Anambra State, south-eastern Nigeria
Source: publisher site journal article supplement (doi:10.1515/psr-2022-0319), 2023-03-06
Supplement: Supplementary file 2 [file j_psr-2022-0319_suppl_001.docx]

REFERENCES

1. Zhou Y. Guan J. Gao W. Lv S. Ge M. Quantification and confirmation of fifteen carbamate pesticide residues by multiple reaction monitoring and enhanced product ion scan modes via Lc-MS/MS QTRAP system molecules. 2018, 23, 2488-2496.
2. Rahmawati S., Kirana LC. Yoneda M. Oginawati DK. Risk Analysis on Organochlorine Pesticides Residue in Potato and Carrot from Conventional and Organic Farms in Citarum Watershed Area, West Java Province, Indonesia. Jurnal Sains dan Teknologi Lingkungan. 2017, 9(1), 1-15.
3. Cox C. Surgan M. Unidentified inert ingredient in pesticides: Implication for human developmental health. *Perspectives* 2006, 111,377-382.
4. Gonzales M. Miglioranza KS. Aizpún de Moreno, JE. Moreno VJ. Occurrence and distribution of organochlorine pepticides (OSPs) in Tomato (Lycopersion esculentum) crops from organic production, J. Agric. Food Chem, 2003, 51(5), 1353-1359.
5. Ward MH. Colt JS. Metayer C. Gunier RB. Lubin J. Crouse V. Nishioka MG. Reynolds P. Buffler PA. Residential exposure to polychlorinated biphenyls and Organochlorine pesticides and risk of childhood leukemia. Health Perspect. 2009, 117, 1007–1013.
6. Okechukwu VU. Omokpariola DO. Onwukeme VI. Nweke EN. Omokpariola PL. Pollution investigation and risk assessment of polycyclic aromatic hydrocarbons in soil and water from selected dumpsite locations in rivers and Bayelsa State, Nigeria. Environmental Health Analysis and toxicology 2021, 36(4)
7. USEPA-IRIS, Integrated Risk Information System (IRIS) Assessments: List A to Z Chemical Assessments. Environmental Protection Agency, Washington D.C. 2019. Available from: <https://cfpub.epa.gov/ncea/iris_drafts/atoz.cfm>
8. Zahid A. Muhammad S. Ali S. Mujeeb R. Soomro A. Zaib J. Nazia R. Zaira PT. Farheen S. Farmers’ Perceptions about Effects of Pesticides Use in Vegetables in Taluka Usta Muhammad of Jaffarabad district, Balochistan J. Nat. Sci. Res. 2016, 2224-3186.
9. Abdullahi AE. Aguoru CU. Ogbonna IO. Olasan JO. Umar ND. Assessment of Pesticide Residues in Some Commonly Cultivated Vegetables in Doma Metropolis, Nasarawa State, Nigeria. Int J Environ, Agric Biotechnol.2019, 4(3), 797-804.
10. Falaju J. How to preserve beans, grains without poisonous chemicals. Retrieved June 24, 2019 from <http://www.google.com/amp/s/guardian.ng/Features/BusinessAgrohow-to-preserve-beans-without-poisonous-chemicals>. 2019.
11. Vincent AY. Safina B. Effective ways to control beans, maize storage pests. Retrieved June 24, 2019, from [www.dailytrust.com.ng/effective-ways-to-control-beans-maizestorage-pest](http://www.dailytrust.com.ng/effective-ways-to-control-beans-maizestorage-pest). 2019.
12. Anastassiades M. Lehotay SJ. Stajnbaher D. Schenck FJ. Fast and easy multiresidue method employing acetonitrile extraction/partitioning and Dispersive Solid-Phase Extraction for the determination of pesticide residues in produce. J. AOAC Int. 2003, 86 (1–2), 412–431.
13. Mekonnen B. Siraj J. Negash S. Determination of Pesticide Residues in Food Premises Using QuECHERS Method in Bench-Sheko Zone, Southwest Ethiopia." BioMed Research International. 2021, 6612096: 1-13. <https://doi.org/10.1155/2021/6612096>
14. Oyeyiola AO. Fatunsin OT. Akanbi LM. Fadahunsi DE. Moshood MO. Human health risk of organochlorine pesticides in foods grown in Nigeria, J. Health Pollut. 2017, 7 (15), 63–70.
15. UK/EC. Maximum residue levels in commodities set by United Kingdom and European commission. 2008. Available online at. <https://secure.pesticides.gov.uk/MRLs/search.asp>
16. Shalaby SEM. Abdou GY. El-Metwally IM. Abou-elella GMA. Health risk assessment of pesticide residues in vegetables collected from Dakahlia, Egypt. J Plant Protect Res. 2021, 61(3): 254–264 <https://doi.org/10.24425/jppr.2021.137951>
17. USEPA. Risk Assessment Guidance for Superfund: Volume III—Part A, Process for Conducting Probabilistic Risk Assessment. US Environmental Protection Agency, Washington, DC, USA. 2001. Available at. <https://www.epa.gov/sites/production/files/2015-09/documents/rags3adt_com> plete.pdf.
18. USEPA. Child-specific exposure factors handbook (final report). Washington D.C.: Environmental Protection Agency; 2008 687 p. Available from: <https://cfpub.epa.gov/ncea/risk/recordisplay.cfm?deid=199243>. Accessed on 12 November 2021.
19. WHO. GEMS/food regional diets. Regional per capita consumption of raw and semi-processed agricultural commodities. 2009. <http://www.who.int/foodsafety/publications/chem/regional_diets/en/> Accessed on 12 November 2021.
20. WHO. GEMS/food regional diets (regional per capita consumption of raw and semi-processed agricultural commodities). 2006. [Available on: <http://www.who.int/foodsafety/publications/chem/regional_diets/en/> Accessed on 12 November 2021.
21. USEPA-IRIS. Integrated Risk Information System (IRIS) Assessments: List A to Z Chemical Assessments. Environmental Protection Agency, Washington D.C. 2019. Available from: https://cfpub.epa.gov/ncea/iris_drafts/atoz.cfm?list_type¼alpha. Accessed on 12 November 2021.
22. Gray GM. The Precautionary Principle in Practice: Comparing US EPA and WHO pesticide risk assessments. Harvard Center for Risk Analysis: Risk in Perspective. Using Decision Science to Promote Reasoned Responses to Health, Safety, and Environmental Risks. 2004, 12:1 (1-6).
23. Forkuoh F. Boadi NO. Borquaye LS. Aful S. Risk of Human Dietary Exposure to Organochlorine Pesticide Residues in Fruits from Ghana. Scientific Reports. 2018, 8:16686 (1-5). <https://doi.org/10.1038/s41598-018-35205-w>
24. USEPA. Slope Factors (SF) for Carcinogens from US EPA. Environmental Protection Agency, Washington, D.C. 2007. Available from: http://www.popstoolkit.com/tools /HHRA/SF_USEPA.aspx.
25. Lozowicka B. Kaczynski P. Wolejko E. Piekutin J. Sagitov A. Toleubayev K. Abzeitova E. Evaluation of organochlorine pesticide residues in soil and plants from east Europe and Central Asia. Desalination Water Treat. 2017, 57(3),1310-1321.
26. Sosan MB. Oyekunle JAO. Organochlorine pesticide residue levels and potential human risks in kolanut from selected markets in Osun State, Southwestern Nigeria. Asian Journal of Chemical Science 2017, 2(4),1-11*.*
27. Opuni KFM. Asare‑Nkansah S. Osei‑Fosu P. Akonnor A. Bekoe SO. Dodoo ANO. Monitoring and risk assessment of pesticide residues in selected herbal medicinal products in Ghana. Environ Monit Assess 2021, 193(470), 1-14. https://doi.org/10.1007/s10661-021-09261-1
28. Otitoju O. Lewis CC. Health risk assessment of pesticide residues in bean samples from Wukari, Taraba State, Nigeria. Journal of Environmental Chemistry and Ecotoxicology. 2021, 12(1): 1-13. https://doi.org/10.5897/JECE2019.0456
29. Nardelli V. D’Amico V. Ingegno M. Rovere I. Iammarino M. Casamassima F. Calitri A. Nardiello D. Li D. Quinto M. Pesticides Contamination of Cereals and Legumes: Monitoring of Samples Marketed in Italy as a Contribution to Risk Assessment. Appl. Sci. 2021, 11(7283): 1 – 12. https://doi.org/10.3390/app11167283
30. Adeleye AO. Sosan MB. Oyekunle AO. Dietary exposure assessment of organochlorine pesticides in two commonly grown leafy vegetables in South-western Nigeria. Heliyon 2019, 5, e01895.
31. Obida MG. Stephen SH. Goni AD. Victor OO. Pesticide Residues in Bean Samples from Northeastern Nigeria. ARPN Journal of Science and Technology 2012, 2(2):34-37.
32. Ogar CO. Tettey J. Coker HB. Adepoju-Bello AA. Analysis of Organochlorine pesticide residues in beans from markets in Lagos Sate, Nigeria. West African Journal of Pharmacy 2012, 23(1), 60-68.
33. Erhunmwunse NO. Dirisu A. Olomukoro JO. Implications of pesticide usage in Nigeria. Tropical Freshwater Biology, 2012, 21 (1): 15- 25.
34. Iliya HA. Wannang NN. Falang KD. Nehemiah JA. Evaluation of some pesticide residues in stored beans in Jos, Nigeria. West African Journal of Pharmacology and Drug Research 2012, 28:1-5.
35. Otitoju O. Lewis CC. Health risk assessment of pesticide residues in bean samples from Wukari, Taraba State, Nigeria. (“Health risk assessment of pesticide residues in bean samples from ...”) Journal of Environmental Chemistry and Ecotoxicology. 2021, 12(1): 1-13. <https://doi.org/10.5897/JECE2019.0456>
36. Zawiyah S. Cheman YB. Nazimah SAH. Chin CK. Tsukamoto I. Hamanyza AH. Norhaizan I. Determination of organochlorine and pyrethroid pesticides in fruit and vegetables using SAX/PSA cleanup column. *Food Chem.,* 2007, 102: 98–103.
37. Watts M. Poisoning our future: Children and Pesticides. Pesticide Action Network Asia and the Pacific, 10850 Penang, Malaysia. 2013. e-ISBN: 978-983-9381-62-7
38. Arowora KA. Imo C. Yakubu. OE. Kukoyi AJ. Ugwuoke KC. Igwe EO. Nutritional composition and pesticide residue levels of Some cereal grains sold in wukari, taraba state. FUW Trends in Science & Technology Journal, 2020, 5(1), 111 – 116.
39. EPA. (1998). Hired Farm Workers and Well‐being at Risk. US General Accounting Office Report to Congressional Requesters.
40. Chaikasem S. Roi-et Na V. Health risk assessment of pesticide residues in vegetables from river basin area. Environmental Research 2020, 42 (2): 46–61. https://doi.org/10.35762/AER.2020.42.2.4
41. Fantke P. Gillespie BW. Juraske R. Jolliet O. Estimating half-lives for pesticide dissipation from plants. Environmental Science and Technology 2014, 48: 8588–8602. https://doi.org/10.1021/es500434p
42. Fantke P. Juraske R. Variability of pesticide dissipation half-lives in plants. Environmental Science and Technology 2013, 47: 3548–3562. https://doi.org/10.1021/es303525x
43. Malhat F. Kasiotis KM. Shalaby EM. Magnitude of cyantraniliprole residues in tomato following open field application: A prelude to risk assessment. Environmental Monitoring and Assessment 2018, 190, 116. https://doi.org/10.1007/s10661-018-6496-7
44. Khan N., Yaqub G., Hafeez T., Tariq M. 2020. "Assessment of health risk due to pesticide residues in fruits, vegetables, soil, and water. Journal of Chemistry 2020: 1–7. https://doi.org/10.1155/2020/5497952
45. Hossain MS. Fakhruddin ANM. Chowdhury AZM. Rahman MA. Alam KM. Health risk assessment of selected pesticide residues in locally produced vegetables of Bangladesh. International Food Research Journal 2015, 22 (1): 110–115.
46. Li XH. Wang W. Wang J. Cao XL. Wang XF. Liu JC. Liu XF. Xu XB. Jiang XN. Contamination of soils with organochlorine pesticides in urban parks in Beijing, China, Chemosphere, 2008, 70 (9), 1660-1668.
47. Taiwo AM. Talabi OP. Akintola AA. Babatunde ET. Olanrewaju MO. Adegbaju BH. Odebo SL. Bello AA. Matti OF. Adesanya AA. Ahmad SM. Evaluating the potential health risk of organochlorine pesticides in selected protein foods from Abeokuta southwestern Nigeria, Environmental Pollutants and Bioavailability, 2020, 32(1), 131-145, <https://doi.org/10.1080/26395940.2020.1816498>
48. WHO. 2006. "Principles for Evaluating Health Risks in Children Associated with Exposure to Chemicals." (“Summary of principles for evaluating health risks in children ...”) Environmental Health Criteria 237. World Health Organization, Geneva.
49. WHO. 2010. Persistent Organic Pollutants: Impact on Child Health. World Health Organization, Geneva.
50. Skinner MK, Manikkam M, Guerrero-Bosagna C. 2011. Epigenetic transgenerational actions of endocrine disruptors. Reprod Toxicol 31(3):337-343.
51. CEH. 2012. Pesticide exposure in children. Pediatrics 130(6):e1757-1763.
52. Bornman R, de Jager C, Worku Z, Farias P, Reif S. 2010. DDT and urogenital malformations in newborn boys in a malarial area. (“DDT and urogenital malformations in newborn boys in a malarial area”) BJU Int 106(3): 405-11.
53. Gaspari L, Paris F, Jandel C, Kalfa N, Orsini M, Daurès JP, Sultan C. 2011a. Prenatal environmental risk factors for genital malformations in a population of 1442 French male newborns: a nested case-control study. Hum Repro 26(11):3155-62.
54. Gaspari L, Paris FO, Jeandel C, Sultan C. 2011b. Peripheral precocious puberty in a 4-month-old girl: role of pesticides? Gynecol Endocrinol 27(9):721-4.
55. EFSA (European Food Safety Authority), Medina-Pastor P and Triacchini G. (2020). (“ensuring the highest safety standards”) The 2018 European Union report on pesticide residues in food. (“The 2018 European Union report on pesticide residues in food - EFSA”) EFSA Journal;18(4):6057, 103 pp. https://doi.org/10.2903/j.efsa.2020.6057
56. Adeoluwa, O.A., Mosudi, B.S., John, A. and Oyedele, O. (2019). Occurrence and Human Health Risk of Dichlorodiphenyltrichloroethane (DDT) and Hexachlorocyclohexane (HCH) Pesticide Residues in Commonly Consumed Vegetables in Southwestern Nigeria. (“Occurrence and Human Health Risk of Dichlorodiphenyltrichloroethane ...”) Journal of Health and Pollution 9(23):1-13.
57. Nardelli, V.; D’Amico, V.; Ingegno, M.; Della Rovere, I.; Iammarino, M.; Casamassima, F.; Calitri, A.; Nardiello, D.; Li, D.; Quinto, M. (2021). (“Pesticides Contamination of Cereals and Legumes: Monitoring of Samples ...”) "Pesticides Contamination of Cereals and Legumes: Monitoring of Samples Marketed in Italy as a Contribution to Risk Assessment." (“Pesticides Contamination of Cereals and Legumes: Monitoring of Samples ...”) Appl. Sci. 11(7283): 1 – 12. https://doi.org/10.3390/app11167283
58. Omokpariola P.L. and Omokpariola D.O. (2021). "Institutional Framework for the Sound Management of Chemicals and Chemical Industries in Nigeria." (“[ASAP] Institutional Framework for the Sound Management of Chemicals”) ACS Chemical Health and Safety. 28(6): 457-467. <https://doi.org/10.1021/acs.chas.1c00045>
59. Omokpariola P.L. and Omokpariola D.O. (2021). "Health and Exposure risk assessment of heavy metals in rainwater samples from selected locations in Rivers State, Nigeria." (“Health and exposure risk assessment of heavy metals in rainwater ...”) In: Ponnadurai Ramasami (Ed.), Chemical Sciences in the Focus Vol. 2. Pp 16-23. ISBN 978-3-11-072659-6. <https://doi.org/10.1515/9783110726145-002>
60. Mekonnen, B. Siraj, J. and Negash, S. (2021). "Determination of Pesticide Residues in Food Premises Using QuECHERS Method in Bench-Sheko Zone, Southwest Ethiopia." (“Determination of Pesticide Residues in Food Premises Using ... - Hindawi”) BioMed Research International. 6612096: 1-13. <https://doi.org/10.1155/2021/6612096>
61. Fatunsin, O.T., Oyeyiola, A.O. Moshood, M.O. Akanbi, L.M. and Fadahunsi, D.E. (2020). (“Human health risk assessments of organochlorine pesticides in ... - Heliyon”) "Dietary risk assessment of organophosphate and carbamate pesticide residues in commonly eaten food crops." (“Dietary risk assessment of organophosphate and carbamate pesticide ...”) Scientific African. e00442: 2468-2276. <https://doi.org/10.1016/j.sciaf.2020.e00442>
62. Opuni, K.F.M., Asare‑Nkansah, S., Osei‑Fosu, P., Akonnor, A., Bekoe, S.O. and Dodoo, A.N.O. (2021). Monitoring and risk assessment of pesticide residues in selected herbal medicinal products in Ghana. Environ Monit Assess (2021) 193: 470 (1-14). <https://doi.org/10.1007/s10661-021-09261-1>
