# Supplementary material for: Concentration levels and risk assessment of organochlorine and organophosphate pesticide residue in selected cereals and legumes sold in Anambra State, south-eastern Nigeria
Source: publisher site journal article supplement (doi:10.1515/psr-2022-0319), 2023-03-06
Supplement: Supplementary file 3 [file j_psr-2022-0319_suppl_002.docx]

APPENDIX

|  | Organochlorine Pesticide MS Chromatogram for Beans | Organophosphate Pesticide MS Chromatogram for Beans |
| --- | --- | --- |
| 1 | 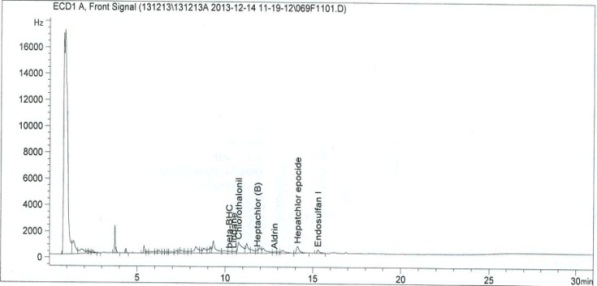 | 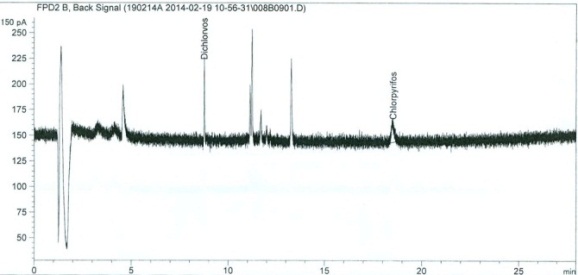 |
| 2 | 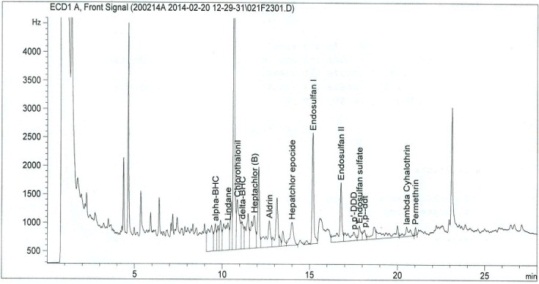 | 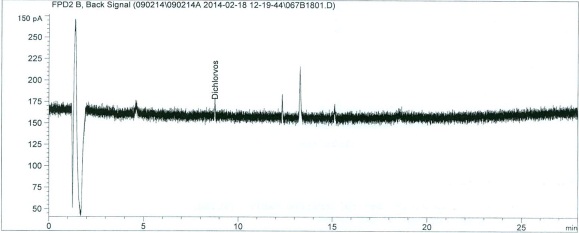 |
| 3 | 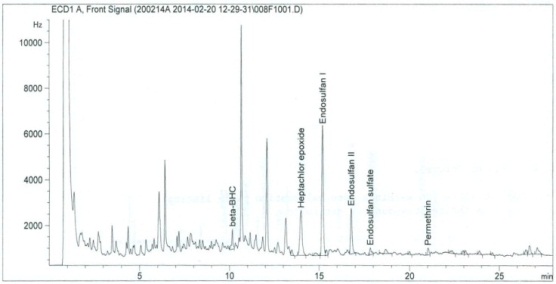 | 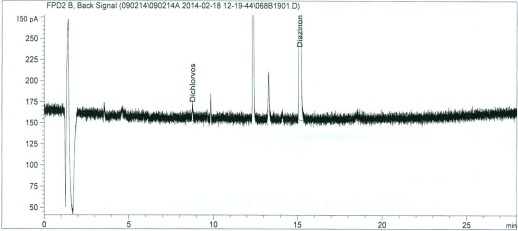 |

|  | Organochlorine Pesticide MS Chromatogram for Cowpea | Organophosphate Pesticide MS Chromatogram for Cowpea |
| --- | --- | --- |
| 1 | 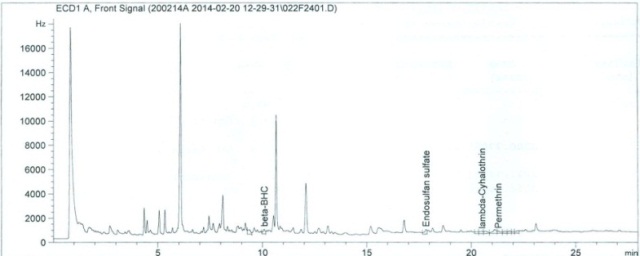 | 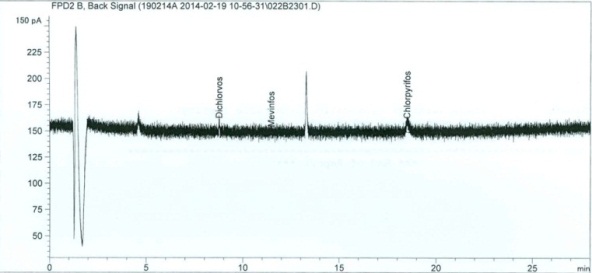 |
| 2 | 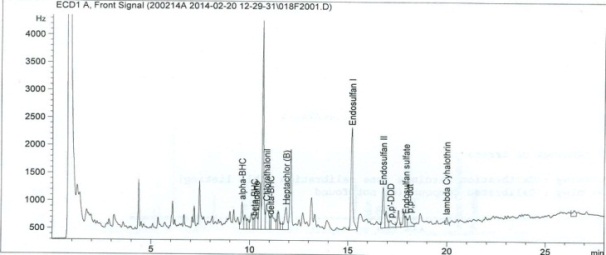 | 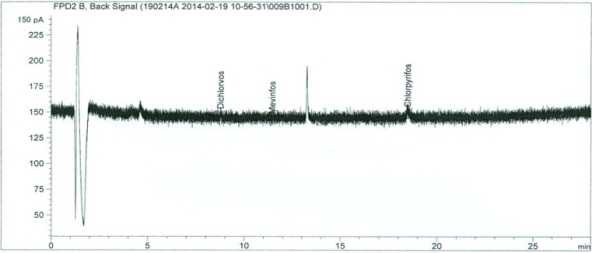 |
| 3 | 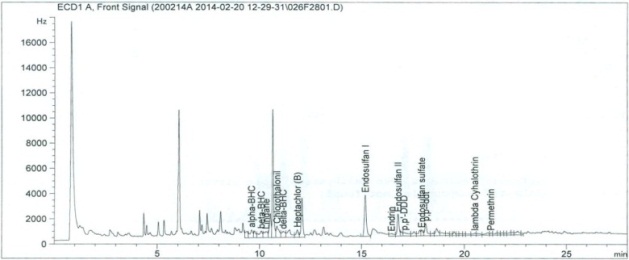 | 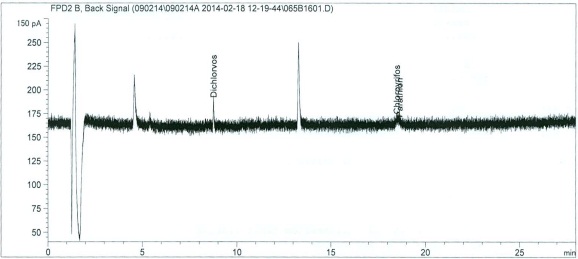 |

|  | Organochlorine Pesticide MS Chromatogram for Maize | Organophosphate Pesticide MS Chromatogram for Maize |
| --- | --- | --- |
| 1 | 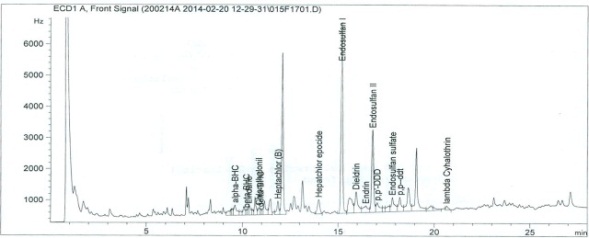 | 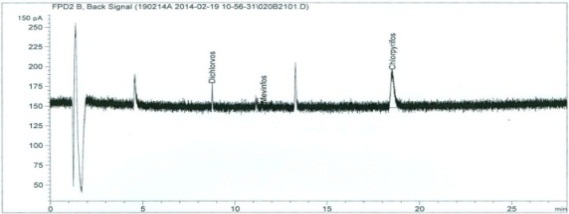 |
| 2 | 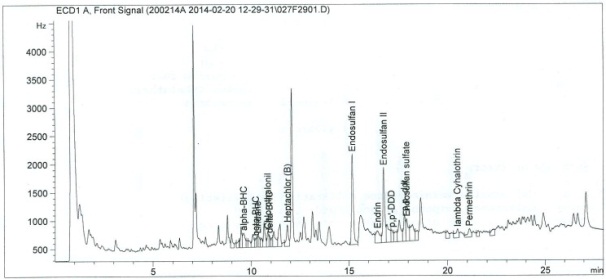 | 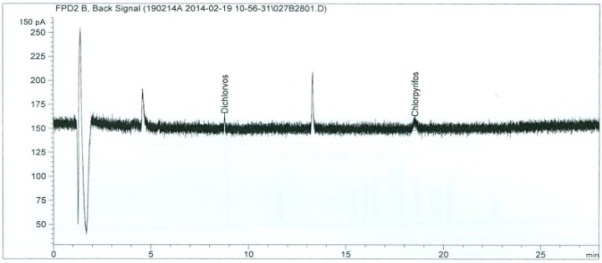 |
| 3 | 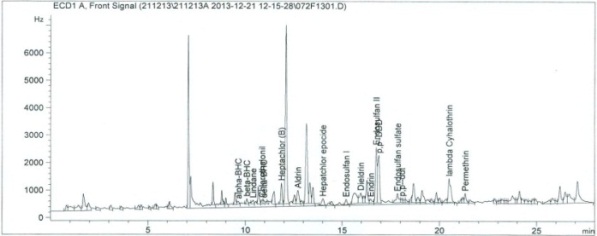 | 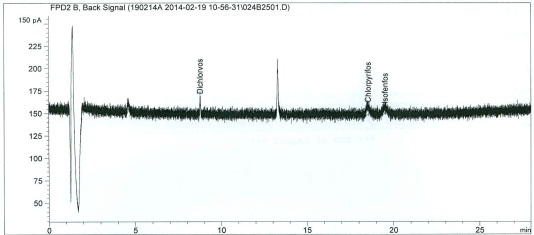 |

|  | Organochlorine Pesticide MS Chromatogram for Millet | Organophosphate Pesticide MS Chromatogram for Millet |
| --- | --- | --- |
| 1 | 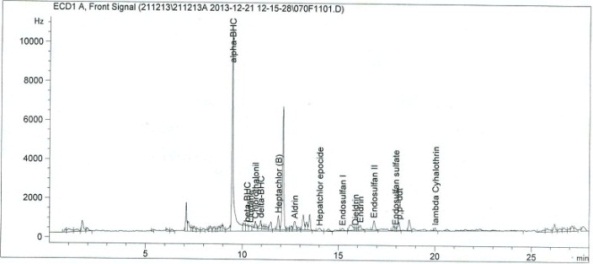 | 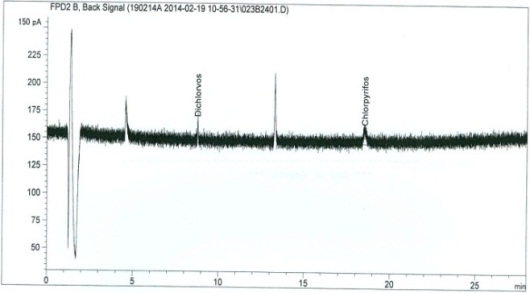 |
| 2 | 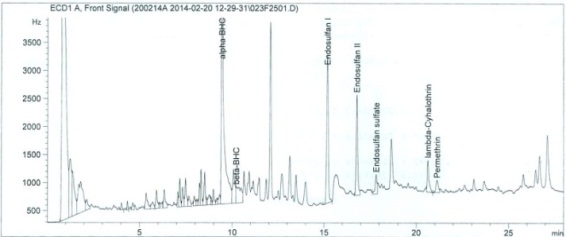 | 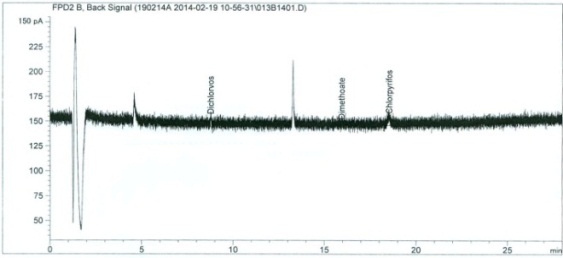 |
| 3 | 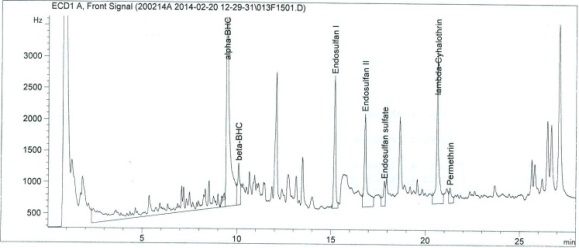 | 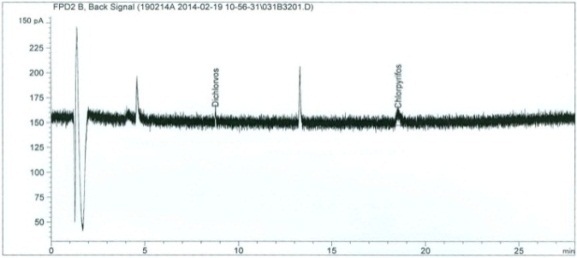 |

|  | Organochlorine Pesticide MS Chromatogram for Sorghum | Organophosphate Pesticide MS Chromatogram for Sorghum |
| --- | --- | --- |
| 1 | 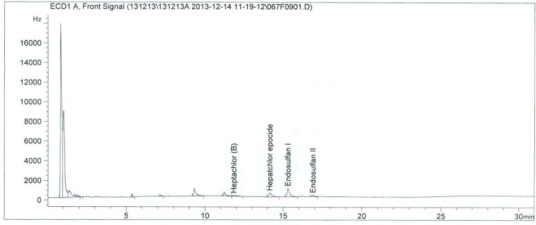 | 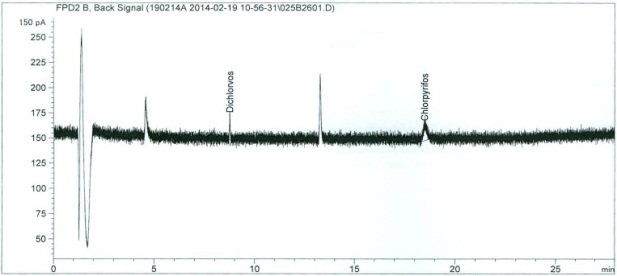 |
| 2 | 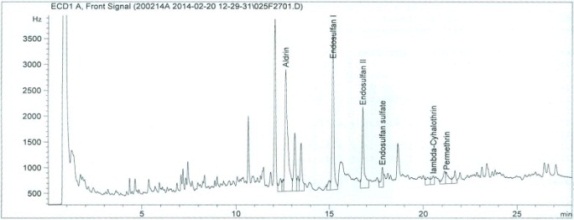 | 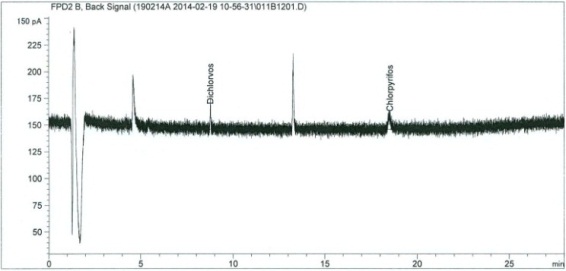 |
| 3 | 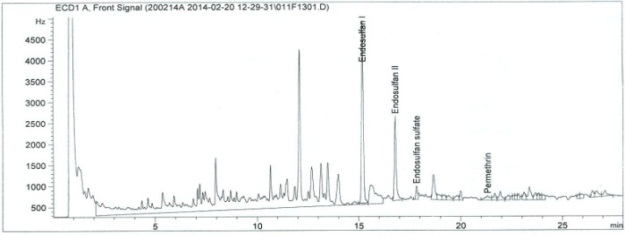 | 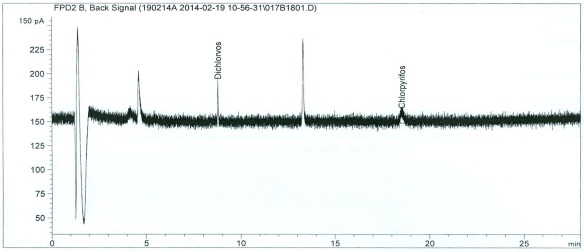 |

|  | Organochlorine Pesticide MS Chromatogram for Rice | Organophosphate Pesticide MS Chromatogram for Rice |
| --- | --- | --- |
| 1 | 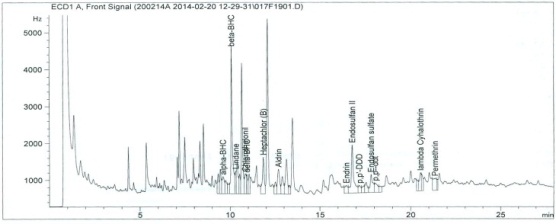 | 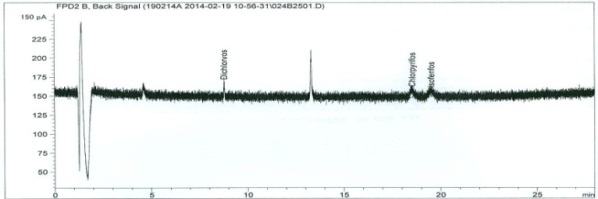 |
| 2 | 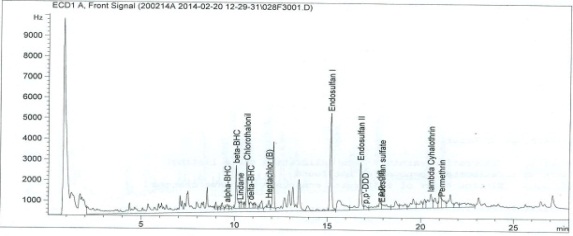 | 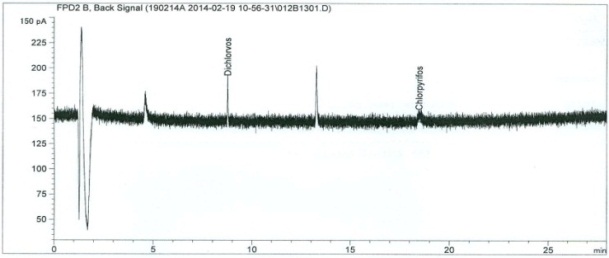 |
| 3 | 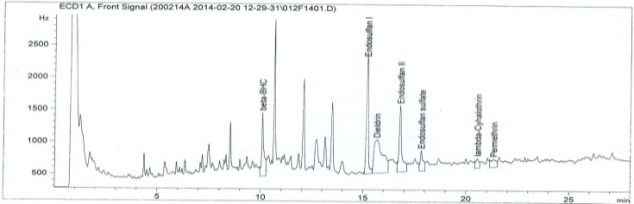 | 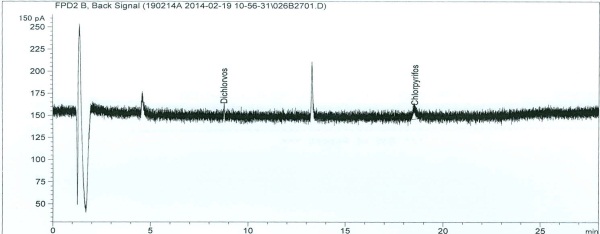 |
